# Supplementary material
Source: Springer Nature journal article supplement (https://www.springerprofessional.de/resource/supplementary/13638_2012_834_MOESM7_ESM.pdf/11898590)

64 Hadamard Codes for Channel 1 at SNR=10dB

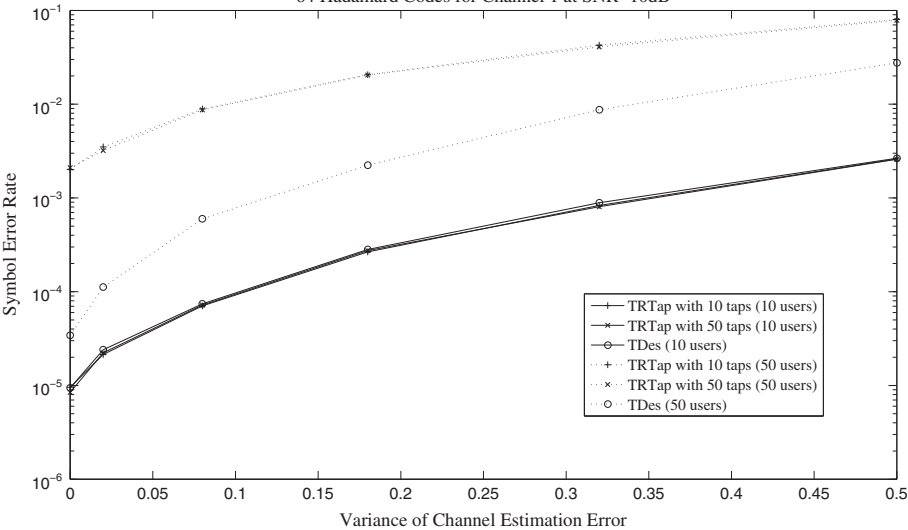

Supplement: MOESM7 [file 11898590]
